# Supplementary material for: Palliative Care Evidence Review Service (PaCERS): a knowledge transfer partnership
Source: PubMed Central journal article supplement (PMC6916007; doi:10.1186/s12961-019-0504-4), 2019-12-16

**Question: What is the impact and effectiveness of the 7 Day CNS services have on palliative care patients and their families?**

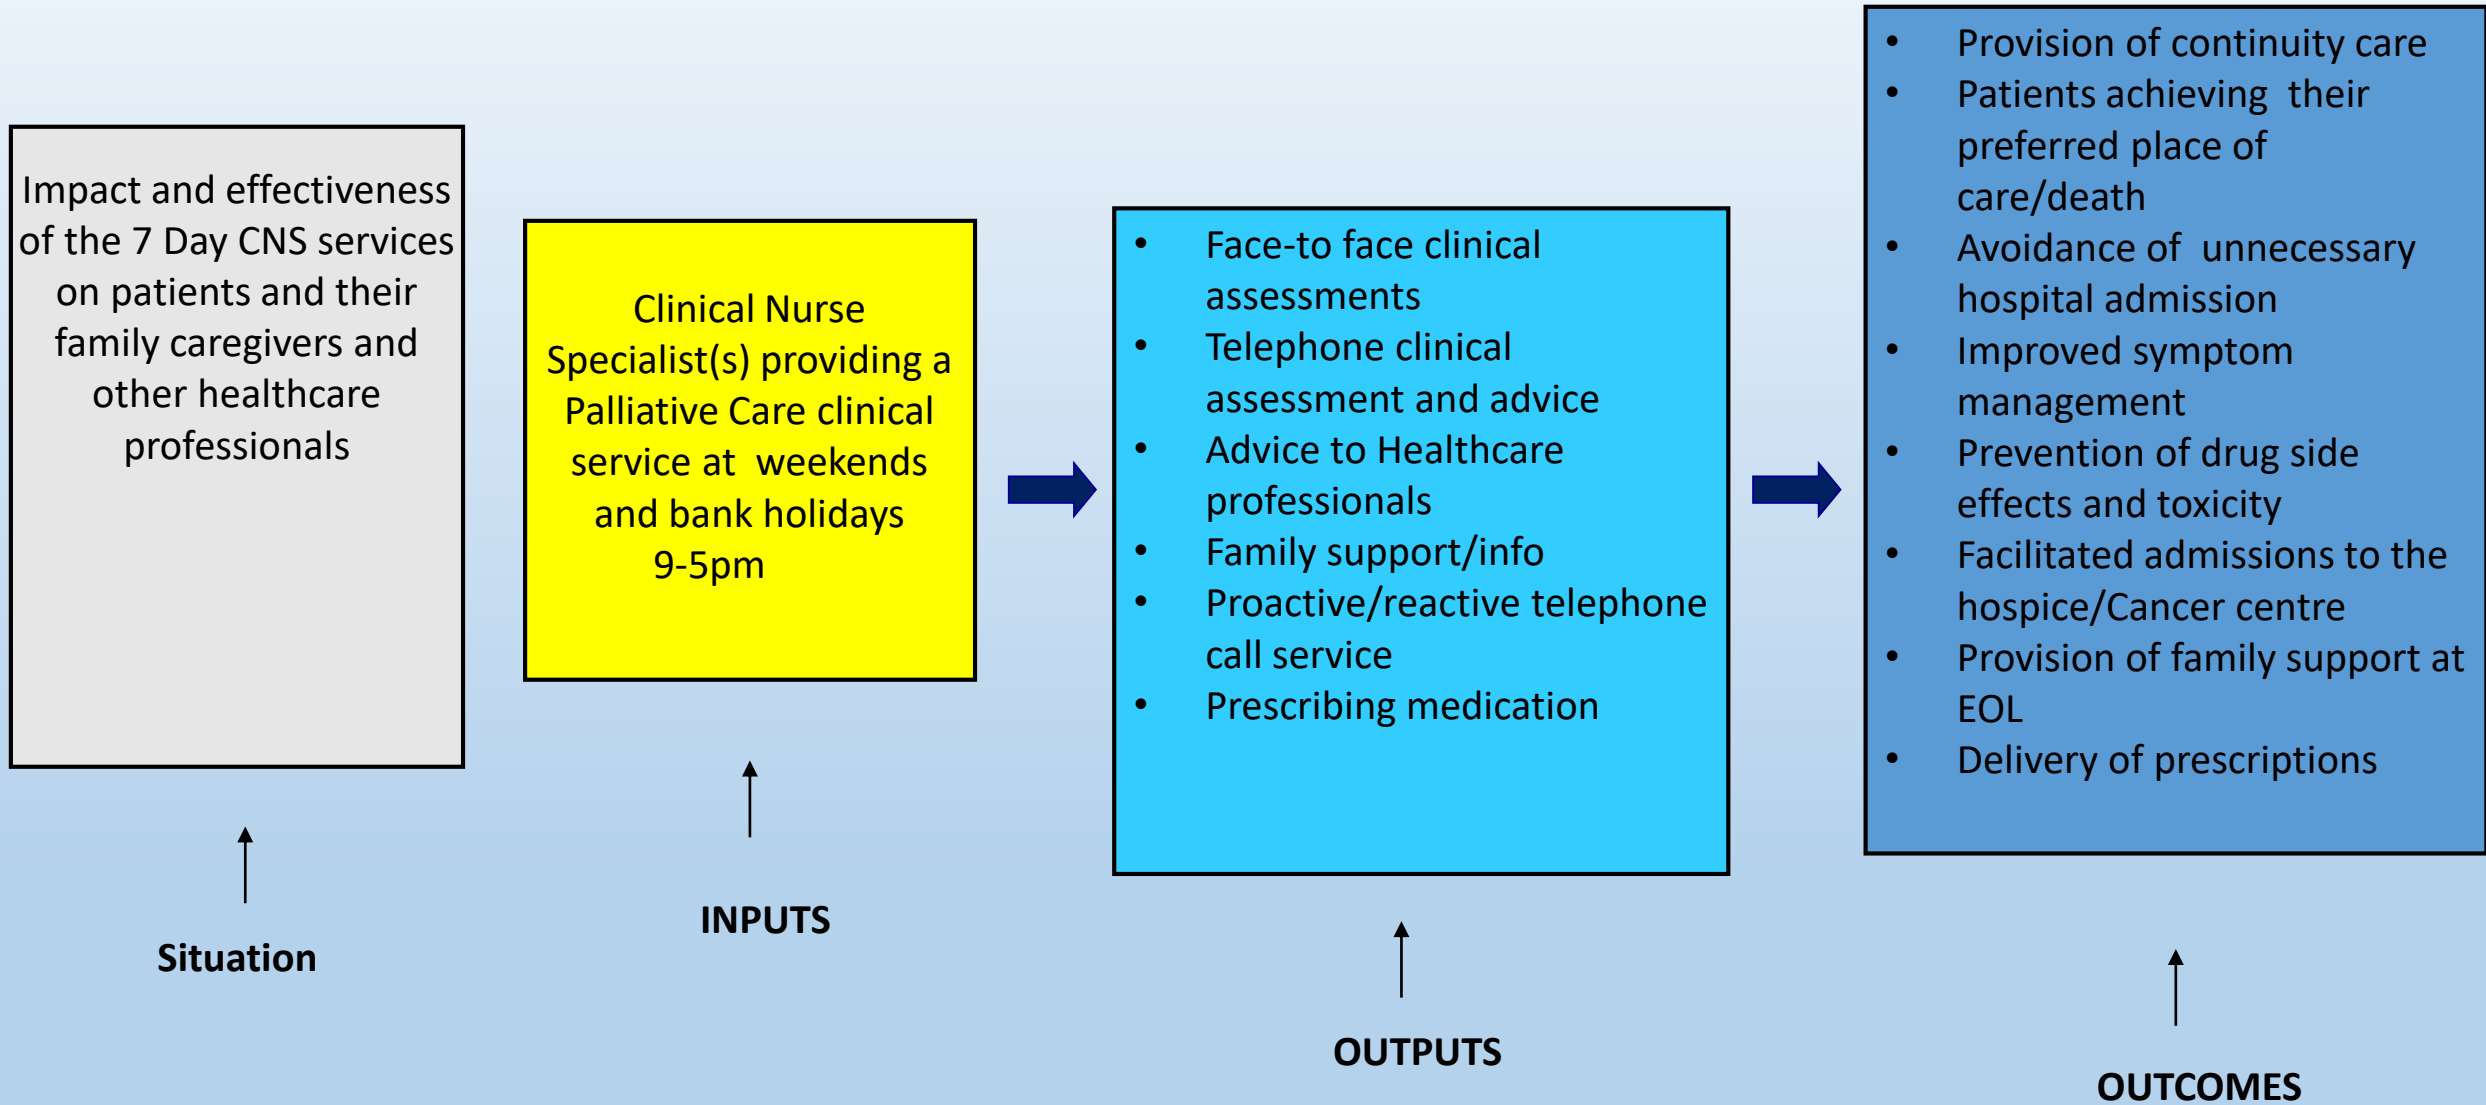

Supplement: 12961_2019_504_MOESM2_ESM.pdf [file 12961_2019_504_MOESM2_ESM.pdf]
