# Supplementary material for: Palliative Care Evidence Review Service (PaCERS): a knowledge transfer partnership
Source: PubMed Central journal article supplement (PMC6916007; doi:10.1186/s12961-019-0504-4), 2019-12-16
Supplement: 12961_2019_504_MOESM5_ESM.pdf [file 12961_2019_504_MOESM5_ESM.pdf]

Additional file 5. Quantitative checklist

The GATE Tool

Checklist for intervention studies.

| GATE CHECKLIST FOR INTERVENTION STUDIES <sup>1</sup><br>(Including randomised trials, non-randomised trials, cohort studies & case series of treatment, prevention & screening)                 |                                                                                                                           |                                              |                                                                                                     |
|-------------------------------------------------------------------------------------------------------------------------------------------------------------------------------------------------|---------------------------------------------------------------------------------------------------------------------------|----------------------------------------------|-----------------------------------------------------------------------------------------------------|
| Study Publication (Vancouver reference)                                                                                                                                                         |                                                                                                                           |                                              |                                                                                                     |
| Appraised by (name, date):<br>Checked by (name, date):                                                                                                                                          |                                                                                                                           |                                              |                                                                                                     |
| SECTION 1: Study Design – Methods & Numbers                                                                                                                                                     |                                                                                                                           |                                              |                                                                                                     |
| <b>Source population.</b> From which population(s), settings & locations were eligible Identified?                                                                                              |                                                                                                                           |                                              |                                                                                                     |
| <b>Eligible population.</b> What were the eligibility (inclusion/exclusion) criteria? What sampling frame / strategy was used to identify eligible from source (e.g. register, admission list)? |                                                                                                                           |                                              |                                                                                                     |
| <b>P</b>                                                                                                                                                                                        | <b>Participants.</b> How were they selected from the eligible populations (e.g. consecutive cases) & when?                |                                              |                                                                                                     |
| <b>E</b>                                                                                                                                                                                        | <b>Exposure(s).</b> Study intervention definition & how/ when/ by whom administered?                                      |                                              |                                                                                                     |
| <b>C</b>                                                                                                                                                                                        | <b>Comparison.</b> Control intervention definition & how/ when/ by whom administered?                                     |                                              |                                                                                                     |
| <b>O</b>                                                                                                                                                                                        | <b>Outcome(s).</b> Definition of 1 & 2 outcomes & how / when / by who assessed? Were they categorical or continuous?      |                                              |                                                                                                     |
| <b>T</b>                                                                                                                                                                                        | <b>Time.</b> If longitudinal, over what time were outcomes measured (dates)? If x-sectional, when were outcomes measured? |                                              |                                                                                                     |
| SECTION 2: INTERNAL STUDY VALIDITY – Potential for bias                                                                                                                                         |                                                                                                                           |                                              |                                                                                                     |
| <b>Evaluation criteria</b>                                                                                                                                                                      |                                                                                                                           | <b>How well were the criteria addressed?</b> | <b>Quality Criteria</b><br>Good = +<br>okay = ~<br>poor = X<br>nr = not reported<br><b>+ ~ x nr</b> |
| <b>Participants</b>                                                                                                                                                                             | <b>Eligible: Inclusion &amp; exclusion criteria:</b> sufficient detail (could be replicated)?                             |                                              |                                                                                                     |
|                                                                                                                                                                                                 | Applied consistently (e.g. multiple cohorts or multi-centre study)?                                                       |                                              |                                                                                                     |
|                                                                                                                                                                                                 | Appropriate given study objectives (e.g. at relevant level of risk)?                                                      |                                              |                                                                                                     |
|                                                                                                                                                                                                 | <b>Participant selection from eligible:</b> sufficient detail on sampling frame/strategy?                                 |                                              |                                                                                                     |

|  |                                                                                                                                        |  |  |
|--|----------------------------------------------------------------------------------------------------------------------------------------|--|--|
|  | Appropriate to study objectives (e.g. volunteers, representative sample)?                                                              |  |  |
|  | Exposure (i.e. intervention) / Comparison definitions: - sufficient detail (could be replicated)?                                      |  |  |
|  | - was there a comparison group? (if not, study is a case series)                                                                       |  |  |
|  | Did investigators determine Exp/Comp allocation (i.e. trial or experiment) or measure Exp/Comp (i.e. non-experimental cohort study)?   |  |  |
|  | If trial, was allocation to Exp/Comp randomised?                                                                                       |  |  |
|  | Were participants blind to exposures?                                                                                                  |  |  |
|  | Were study staff blind to exposures?                                                                                                   |  |  |
|  | If trial & no blinding, was allocation method concealed from study staff & participants?                                               |  |  |
|  | Was Exp/Comp allocation/measurement applied consistently to all participants?                                                          |  |  |
|  | Were Exp & Comp Groups (EG & CG) similar at baseline (e.g. if trial was randomisation successful)?                                     |  |  |
|  | If groups not similar, were differences addressed in analyses/interpretation (e.g. multivariate analyses)?                             |  |  |
|  | Were there likely to be residual differences between Exp/Comp groups that could have important effects on outcomes (i.e. confounding)? |  |  |
|  | Was compliance/adherence to Exp/Comp measured? Re-measured during follow-up?                                                           |  |  |
|  | What was the % compliance/adherence?                                                                                                   |  |  |
|  | Was level of compliance likely to cause important bias?                                                                                |  |  |
|  | Did any of the CG receive the exposure (contamination)? What %?                                                                        |  |  |
|  | Did any of the EG receive the comparison (contamination)? What %?                                                                      |  |  |

|                                                                                                |                                                                                                 |  |  |
|------------------------------------------------------------------------------------------------|-------------------------------------------------------------------------------------------------|--|--|
|                                                                                                | Was there sufficient contamination to cause important bias?                                     |  |  |
|                                                                                                | Aside from study Exp/Comp were EG & CG treated equally (co-intervention)?                       |  |  |
|                                                                                                | Was there sufficient co-intervention to cause important bias?                                   |  |  |
| Outcomes & Time                                                                                | Outcome definitions: - sufficient detail (could be replicated)?                                 |  |  |
|                                                                                                | - Objective & valid measurements?                                                               |  |  |
|                                                                                                | - assessed blind to Exp/Comp allocation?                                                        |  |  |
|                                                                                                | - applied consistently (eg if multi-centre study)?                                              |  |  |
|                                                                                                | Was follow-up long enough to detect important effects?                                          |  |  |
| Analyses                                                                                       | Were all participants initially allocated, accounted for at study conclusion?                   |  |  |
|                                                                                                | What % lost to follow-up (after allocation)? At each stage of study?                            |  |  |
|                                                                                                | Was loss to follow-up sufficient to cause important bias?                                       |  |  |
|                                                                                                | Were all participants analysed in groups they were initially allocated to (intention-to-treat)? |  |  |
| <b>Summary Quality Score for validity: how well did the study minimise bias? (+ or ~ or x)</b> |                                                                                                 |  |  |

| SECTION 3: STUDY RESULTS - magnitude & precision                                                                                                                       |  |  |
|------------------------------------------------------------------------------------------------------------------------------------------------------------------------|--|--|
| Were <b>Exposure Group Occurrence (EGO)</b> & <b>Control Group Occurrence (CGO)</b> given or possible to calculate for all 1 <sup>o</sup> and 2 <sup>o</sup> outcomes? |  |  |
| Were all relevant effect estimates given or possible to calculate for all outcomes (e.g. RR, RD)?                                                                      |  |  |
| Was the precision of effect estimates given or possible to calculate for all outcomes (i.e. CLs & or p-values)? – see Note 3 at end of Checklist.                      |  |  |
| Were the main effect estimates statistically significant?                                                                                                              |  |  |
| If effect estimates NOT statistically significant, were power calculations given or possible to calculate? – see Note 3 at end of Checklist.                           |  |  |
| If effect estimates NOT statistically significant was power sufficient (e.g. > about 70-80%) to identify important effects?                                            |  |  |

|                                                                                                                                                                                   |  |  |
|-----------------------------------------------------------------------------------------------------------------------------------------------------------------------------------|--|--|
| If study stopped early, were interim analyses and stopping rules well described?                                                                                                  |  |  |
| If multi-centre study or multivariate analyses, were results similar in each centre / all strata?                                                                                 |  |  |
| <b>Summary Quality Score for study results: was interpretable data given/possible to calculate for measures of occurrence, estimates of effect &amp; precision? (+ or ~ or x)</b> |  |  |

| <b>SECTION 4: EXTERNAL STUDY VALIDITY – applicability &amp; generalisability</b>                                                                               |                                                                                                                                                            |                                                       |
|----------------------------------------------------------------------------------------------------------------------------------------------------------------|------------------------------------------------------------------------------------------------------------------------------------------------------------|-------------------------------------------------------|
| Participants                                                                                                                                                   | Were descriptions of settings & locations of source population, eligible populations & sampling frame / strategy sufficient to determine generalisability? |                                                       |
|                                                                                                                                                                | What % of eligible participated?                                                                                                                           |                                                       |
|                                                                                                                                                                | What were the reasons for non-participation?                                                                                                               |                                                       |
|                                                                                                                                                                | Were participants representative of eligible population?                                                                                                   |                                                       |
| Exp / comp                                                                                                                                                     | Were study exposures (i.e. interventions) feasible and affordable in usual practice?                                                                       |                                                       |
|                                                                                                                                                                | Was management in the Comparison Group similar to usual practice?                                                                                          |                                                       |
| Outcomes                                                                                                                                                       | Were all important outcomes considered: benefits & harms? (e.g. not just surrogate outcomes)?                                                              |                                                       |
|                                                                                                                                                                | Was it possible to determine the balance of benefits & harms of study exposures (i.e. interventions)?                                                      |                                                       |
| <b>Summary Quality Score for study applicability (+ or – or x)</b><br><small>*Criteria quality scores: + = good, ~ = okay, x = poor, nr = not reported</small> |                                                                                                                                                            |                                                       |
|                                                                                                                                                                |                                                                                                                                                            | <b>a) Could applicability be determined?</b>          |
|                                                                                                                                                                |                                                                                                                                                            | <b>b) Are results generalizable to usual practice</b> |

|                                                              |  |
|--------------------------------------------------------------|--|
| <b>Include/Exclude</b> (if excluded please state the reason) |  |
|--------------------------------------------------------------|--|

Adapted from: Jackson R, Ameratunga S, Broad J, et al. The GATE frame: critical appraisal with pictures. Evidence-based medicine 2006;11(2):35-8. doi: 10.1136/ebm.11.2.35
